# Supplementary material for: Hereditary hemochromatosis disrupts uric acid homeostasis and causes hyperuricemia via altered expression/activity of xanthine oxidase and ABCG2
Source: Oxford University Press journal article supplement (doi:10.1042/bcj20190873), 2020-04-02
Supplement: bcj-2019-0873_supp.pdf [file bcj-2019-0873_supp.pdf]

## Supplementary Information

**Supplementary Table S1.** Sequences of PCR Primers used in this study.

| Target                             | Primer Sequence (5'-3')         |
|------------------------------------|---------------------------------|
| <b>mXO</b>                         | ATG GCA AAA AGG TGG TGG AGA     |
|                                    | GCA ACA TGA TGC AAG GAG CA      |
| <b>mGlut9</b>                      | TGC ATT GGC GTG TTT TCT GG      |
|                                    | AAA GAG AAG GTA GCG TGG GC      |
| <b>mMrp4</b>                       | TCT GCG AGC CAA GAA GGA CT      |
|                                    | TCG TCG GGG TCA TAC TTC TCA     |
| <b>mAbcg2</b>                      | ATA GCC ACA GGC CAA AGT GT      |
|                                    | ACT GCA AAG CTG TGA AGC CA      |
| <b><i>h</i>ABCG2 ChIP primer</b>   | GAG CAG CGC TTG TGA CTG G       |
|                                    | ACA CGC AGG GAC AAG CCA AA      |
| <b><i>h</i>P21 ChIP primer</b>     | CCC ACA GCA GAG GAG AAA GAA     |
|                                    | CTG GAA ATC TCT GCC CAG ACA     |
| <b><i>h</i>GADD45A ChIP Primer</b> | TCC GAC TAG AGT GTG GCT GG      |
|                                    | ATG AGG GGT GAG CCA GGA AT      |
| <b><i>h</i>GAPDH ChIP Primer</b>   | TAC TAG CGG TTT TAC GGG CG      |
|                                    | TCG AAC AGG AGG AGC AGA GAG CGA |
| <b>mUrate Oxidase</b>              | GTG AGC ACT TCC TCT CTT CTT T   |
|                                    | GGA CGT GTT TGA TCC CAT TCT     |
| <b>m/hHPRT</b>                     | GCG TCG TGA TTA GCG ATG ATG AAC |
|                                    | CCT CCC ATC TCC TTC ATG ACA TCT |
| <b>mGAPDH</b>                      | TGT AGA CCA TGT AGT TGA GGT CA  |
|                                    | AGG TCG GTG TGA ACG GAT TTG     |
| <b>hABCG2</b>                      | TCA GAT GGG TTT CCA AGC GT      |
|                                    | AAC CCC AGC TCT GTT CTG GA      |

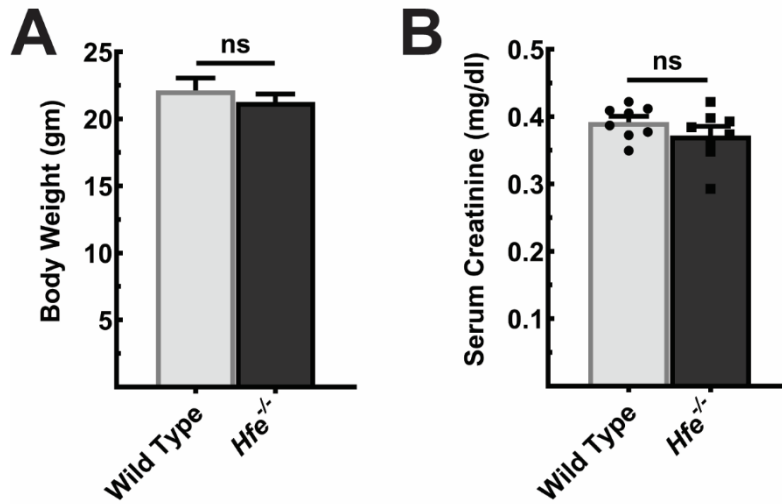

**Supplementary Figure S1. Serum creatinine levels as a surrogate for glomerular filtration rate in *Hfe*<sup>-/-</sup> mouse.** (A) Body weight for *Hfe*<sup>-/-</sup> mice and wild type control mice at the time of serum collection. Data show mean  $\pm$  SEM for 4 mice (all males) per group. ns, not significant. (B) Serum creatinine levels were measured in *Hfe*<sup>-/-</sup> mice and wild type counterparts using Creatinine Assay Kit. Data show mean  $\pm$  SEM for 4 mice per group. ns, not significant.

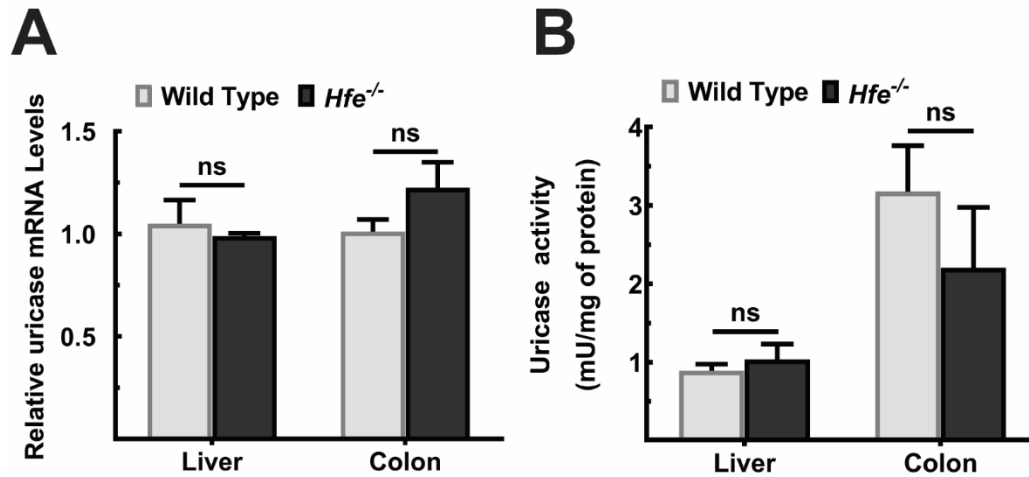

**Supplementary Figure S2. Expression and activity of uricase in wild type and *Hfe*<sup>-/-</sup> mouse liver and colon.** (A) Quantitative PCR analysis of uricase mRNA in liver and colon of *Hfe*<sup>-/-</sup> and wild type mice. Data show mean ± SEM for 3 mice per group. ns, not significant. (B) Uricase activity in wild type and *Hfe*<sup>-/-</sup> mice as assessed by the Amplex® Red Uric Acid/Uricase Assay Kit. Data show the mean ± SEM for 3 mice per group. ns, not significant.

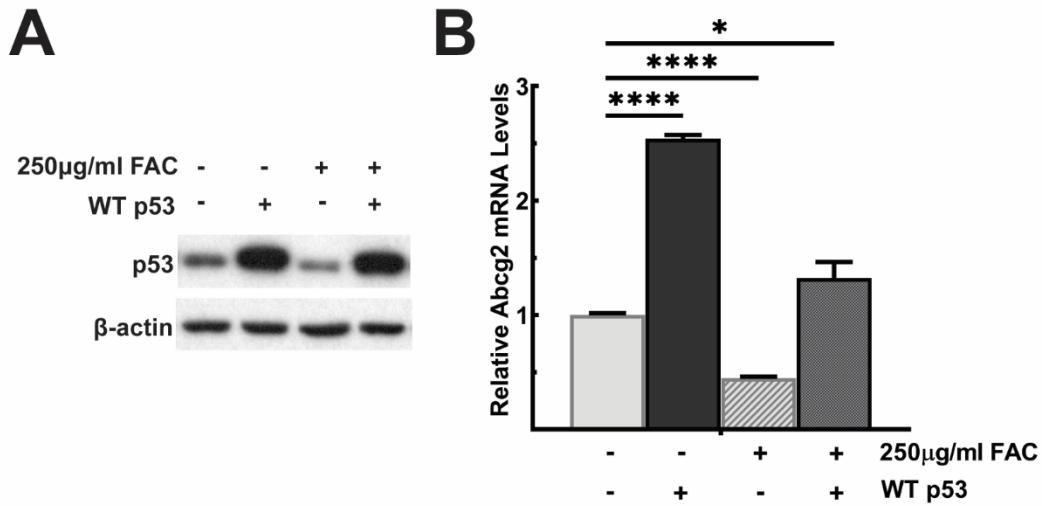

**Supplementary Figure S3. ABCG2 expression levels upon iron-induced p53 degradation and subsequent ectopic overexpression of p53.** HEK293FT cells were chronically treated with 250 µg/ml FAC for three passages to mimic the environment of the chronic exposure to excess iron. Cells then underwent transfection with pcDNA3-p53 or empty pcDNA3 plasmid constructs. FAC was omitted during transfection. Cells were then used for preparation of protein lysates and total RNA. **(A)** Western blot for p53 protein levels. **(B)** Quantitative PCR analysis to assess ABCG2 mRNA levels. Data show mean ± SEM for 3 independent experiments. \* $P < 0.05$ ; \*\*\*\* $P < 0.0001$ .

## Raw Western Blots

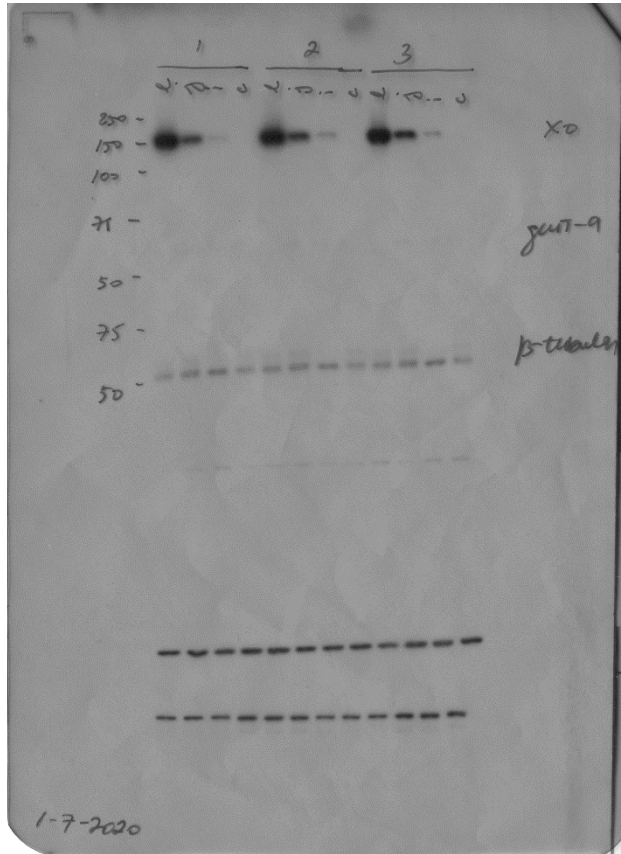

**Supplementary Figure S4.** Rows from the top: (1) XO in WT Liver, Jejunum, Ileum and Colon. Used in Figure 2B. The rest not used. Please disregard.

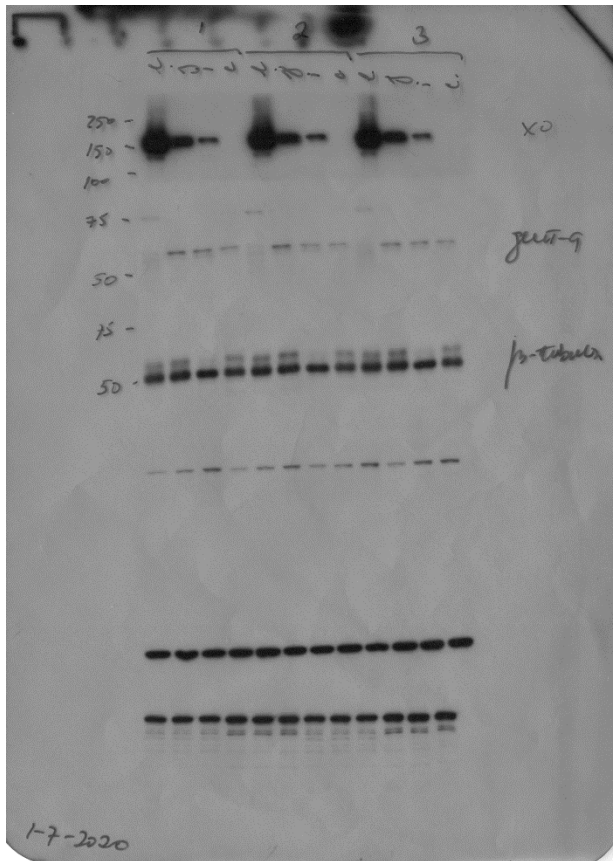

**Supplementary Figure S5.** Rows from the top: (1) XO in WT Liver, Jejunum, Ileum and Colon, longer exposure; (2) Not used. Please disregard; (3)  $\beta$ -tubulin in WT Liver, Jejunum, Ileum and Colon. Used in Figures 2B and 3B. The rest not used. Please disregard.

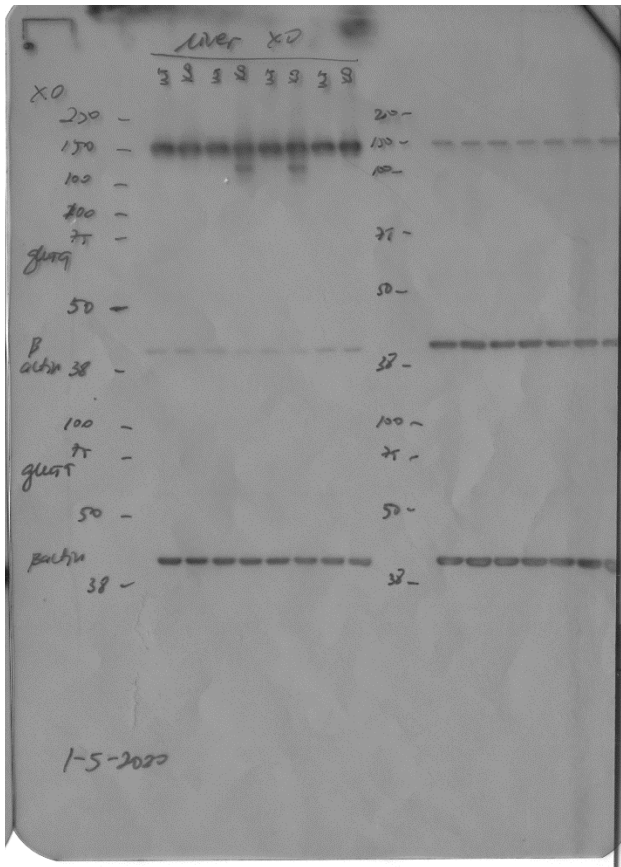

**Supplementary Figure S6.** Top left row: XO in WT (lanes 1,3,5,7) and *Hfe*<sup>-/-</sup> (lanes 2,4,6,8) liver. Used in Figure 2D. The rest not used. Please disregard.

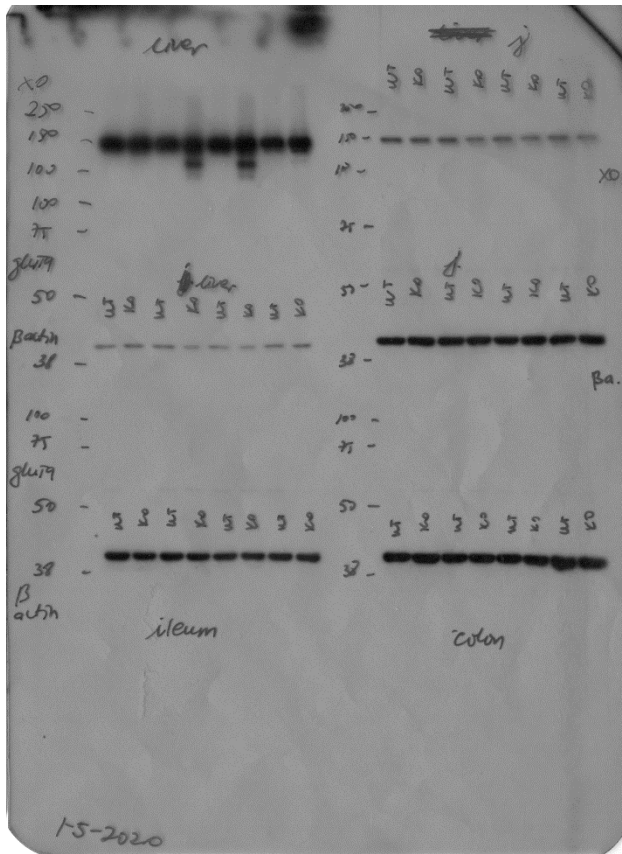

**Supplementary Figure S7.** Top right row: XO in WT (lanes 1,3,5,7) and *Hfe*<sup>-/-</sup> (lanes 2,4,6,8) jejunum. Used in Figure 2D. The rest not used. Please disregard.



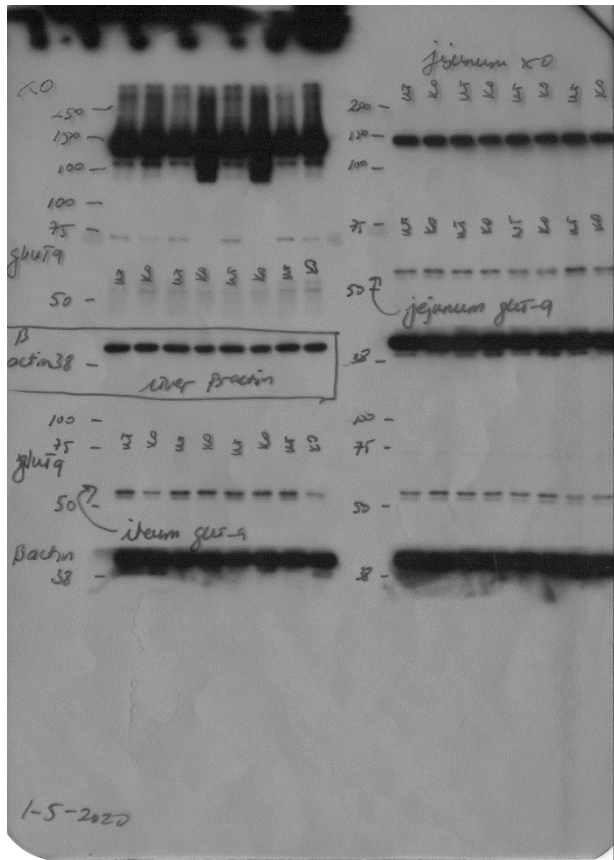

**Supplementary Figure S8.** Middle right row:  $\beta$ -actin in WT (lanes 1,3,5,7) and *Hfe*<sup>-/-</sup> (lanes 2,4,6,8) liver. Used in Figures 2D and 3D. The rest not used. Please disregard.

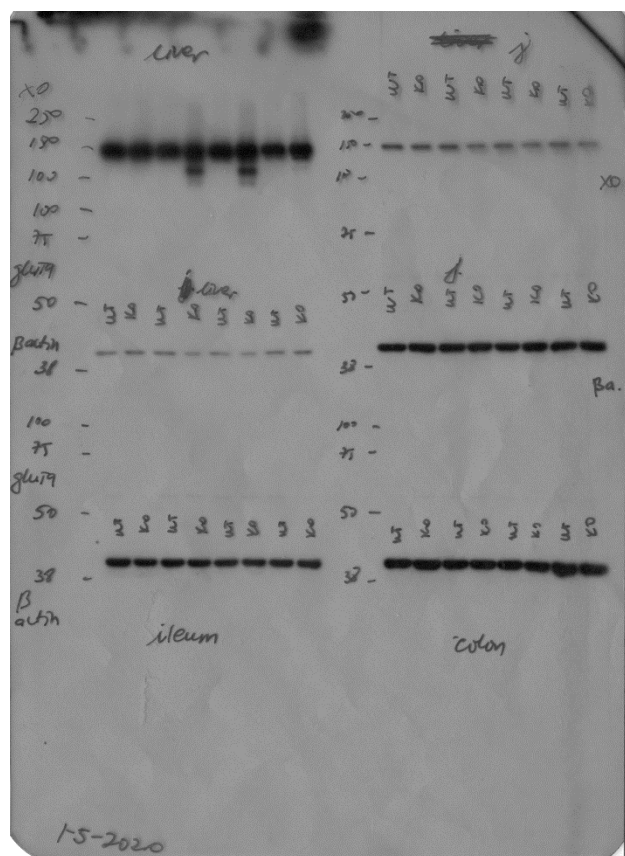

**Supplementary Figure S9.** Left side, rows from the top: (1) XO in WT (lanes 1,3,5,7) and *Hfe*<sup>-/-</sup> (lanes 2,4,6,8) liver. Higher exposure. (2) β-actin in WT (lanes 1,3,5,7) and *Hfe*<sup>-/-</sup> (lanes 2,4,6,8) liver. Lower exposure; (3) β-actin in WT (lanes 1,3,5,7) and *Hfe*<sup>-/-</sup> (lanes 2,4,6,8) ileum. Used in Figure 3D. Right side, rows from the top: (1) XO in WT (lanes 1,3,5,7) and *Hfe*<sup>-/-</sup> (lanes 2,4,6,8) jejunum; (2) β-actin in WT (lanes 1,3,5,7) and *Hfe*<sup>-/-</sup> (lanes 2,4,6,8) jejunum. Used in Figures 2D and 3D; (3) β-actin in WT (lanes 1,3,5,7) and *Hfe*<sup>-/-</sup> (lanes 2,4,6,8) colon. Used in Figure 3D.

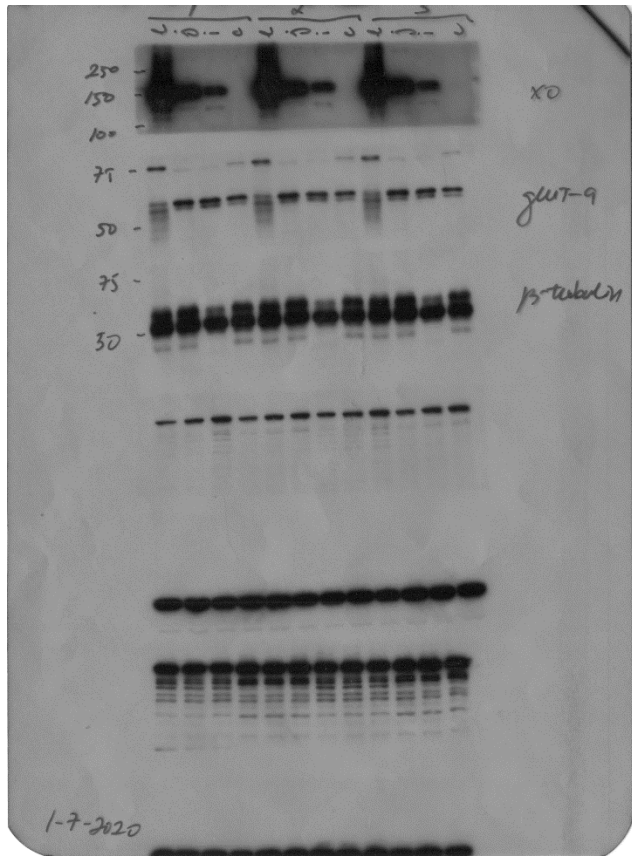

**Supplementary Figure S10.** Rows from the top: (1) XO in WT Liver, Jejunum, Ileum and Colon. Not used. (2) Glut9 in WT Liver, Jejunum, Ileum and Colon. Used in Figure 3B. The rest not used. Please disregard.

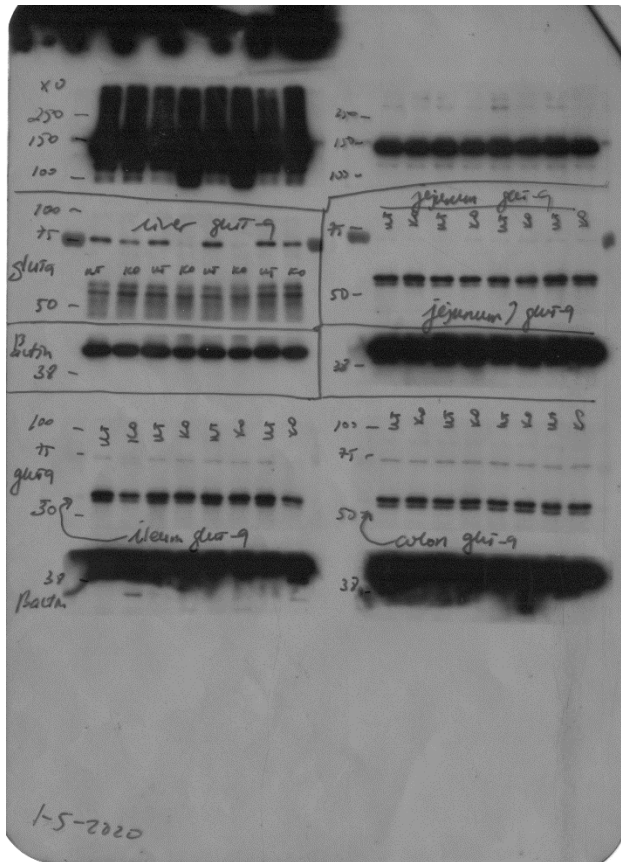

**Supplementary Figure S11.** Left side, rows from the top: (1) Not used, please disregard; (2) Glut9 in WT (lanes 1,3,5,7) and *Hfe*<sup>-/-</sup> (lanes 2,4,6,8) liver. Used in Figure 3D; (3) Not used. Please disregard; (4) Glut9 in WT (lanes 1,3,5,7) and *Hfe*<sup>-/-</sup> (lanes 2,4,6,8) ileum. Used in Figure 3D; (4) Not used. Please disregard. Right side, rows from the top: (1) Not used, please disregard; (2) Glut9 in WT (lanes 1,3,5,7) and *Hfe*<sup>-/-</sup> (lanes 2,4,6,8) jejunum. Used in Figure 3D; (3) Not used. Please disregard; (4) Glut9 in WT (lanes 1,3,5,7) and *Hfe*<sup>-/-</sup> (lanes 2,4,6,8) colon. Used in Figure 3D; (4) Not used. Please disregard.

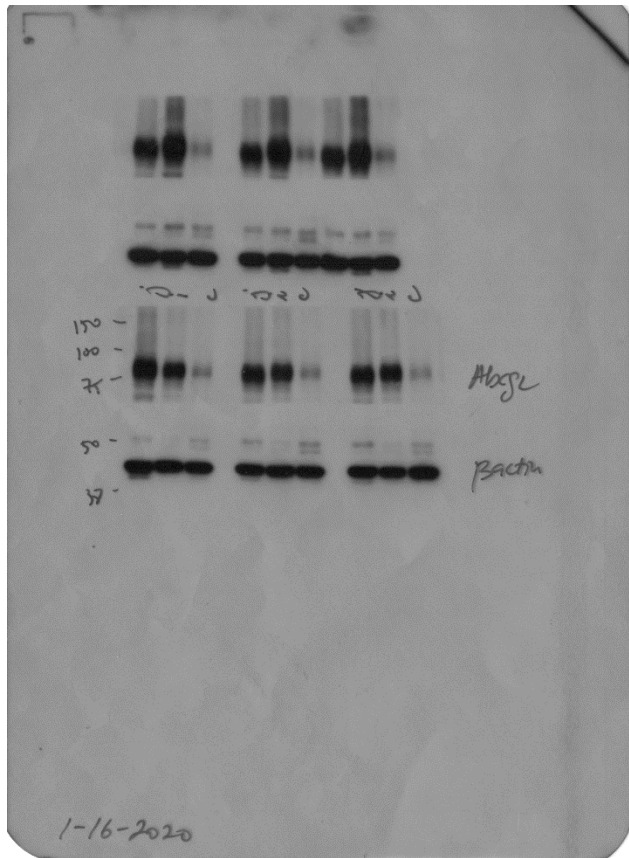

**Supplementary Figure S12.** Rows from the top: (1) and (2) Not used. Please disregard; (3) Abcg2 in jejunum, ileum and colon epithelium, in triplicates. Used in Figure 4B; (4)  $\beta$ -actin in jejunum, ileum and colon epithelium, in triplicates. Used in Figure 4B.

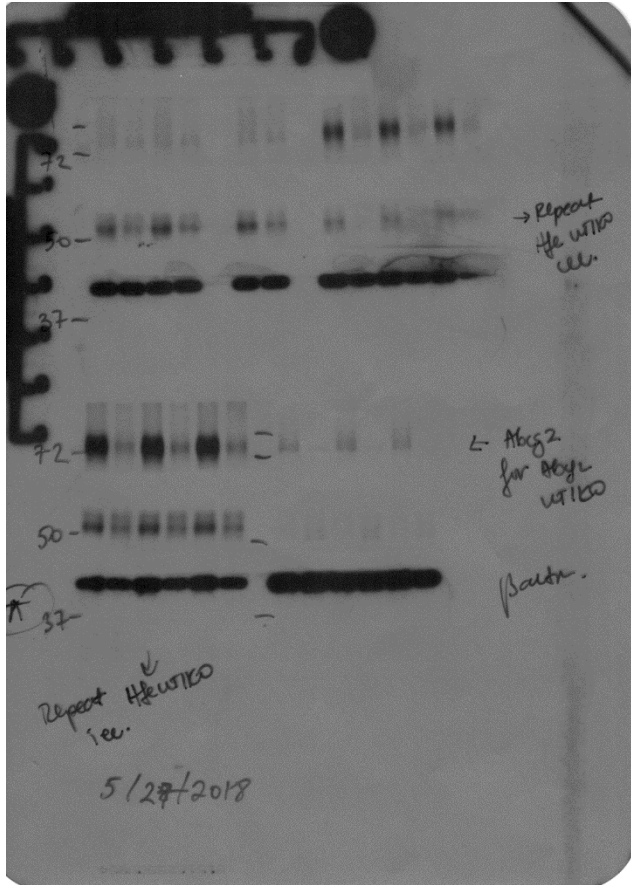

**Supplementary Figure S13.** Rows from the top: (1) Only last 6 lanes used. Abcg2 in WT (lanes 9,11,13) and *Hfe*<sup>-/-</sup> (lanes 10,12,14) colon epithelium. Used in Figure 5B; (2) Only first 7 lanes used (lane 5 is blank). p53 in WT (lanes 1,3,6) and *Hfe*<sup>-/-</sup> (lanes 2,4,7) colon epithelium. Used in Figure 7C; (3)  $\beta$ -actin in WT (lanes 1,3,6,9,11,13) and *Hfe*<sup>-/-</sup> (lanes 2,4,7,10,12,14) colon epithelium. Used in Figures 5B and 7C; (4) Only first 6 lanes used. Abcg2 in WT (lanes 1,3,5) and *Hfe*<sup>-/-</sup> (lanes 2,4,6) ileum epithelium. Used in Figure 5B; (5) Only first 6 lanes used. p53 in WT (lanes 1,3,5) and *Hfe*<sup>-/-</sup> (lanes 2,4,6) ileum epithelium. Used in Figure 7A; (6) Only first 6 lanes used.  $\beta$ -actin in WT (lanes 1,3,5) and *Hfe*<sup>-/-</sup> (lanes 2,4,6) ileum epithelium. Used in Figures 5B and 7A. Please disregard the rest.

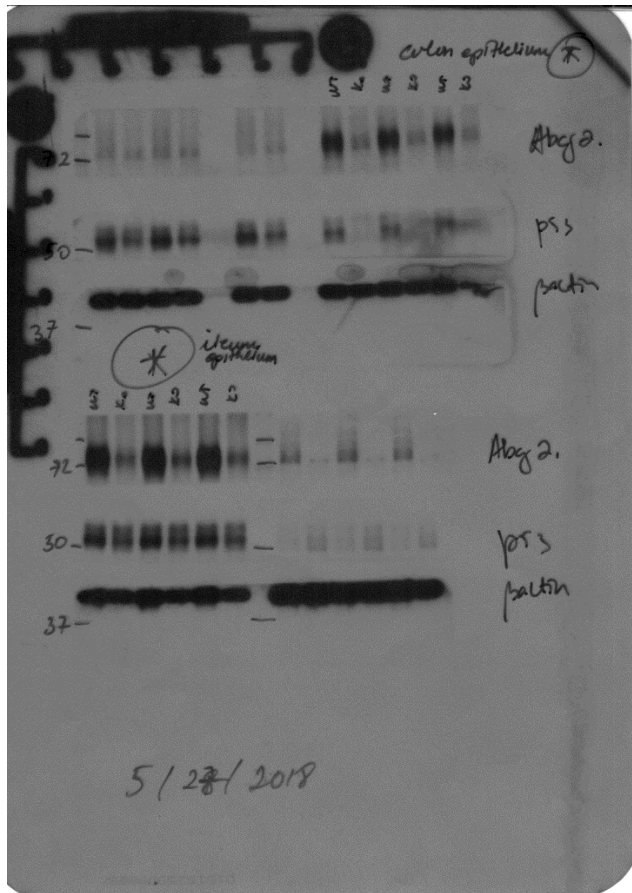

**Supplementary Figure S14.** Higher exposure of Supplementary Figure S13. Rows from the top: (1) Only last 6 lanes used. Abcg2 in WT (lanes 9,11,13) and *Hfe*<sup>-/-</sup> (lanes 10,12,14) colon epithelium. Used in Figure 5B; (2) Only first 7 lanes used (lane 5 is blank). p53 in WT (lanes 1,3,6) and *Hfe*<sup>-/-</sup> (lanes 2,4,7) colon epithelium. Used in Figure 7C; (3)  $\beta$ -actin in WT (lanes 1,3,6,9,11,13) and *Hfe*<sup>-/-</sup> (lanes 2,4,7,10,12,14) colon epithelium. Used in Figures 5B and 7C; (4) Only first 6 lanes used. Abcg2 in WT (lanes 1,3,5) and *Hfe*<sup>-/-</sup> (lanes 2,4,6) ileum epithelium. Used in Figure 5B; (5) Only first 6 lanes used. p53 in WT (lanes 1,3,5) and *Hfe*<sup>-/-</sup> (lanes 2,4,6) ileum epithelium. Used in Figure 7A; (6) Only first 6 lanes used.  $\beta$ -actin in WT (lanes 1,3,5) and *Hfe*<sup>-/-</sup> (lanes 2,4,6) ileum epithelium. Used in Figures 5B and 7A. Please disregard the rest.

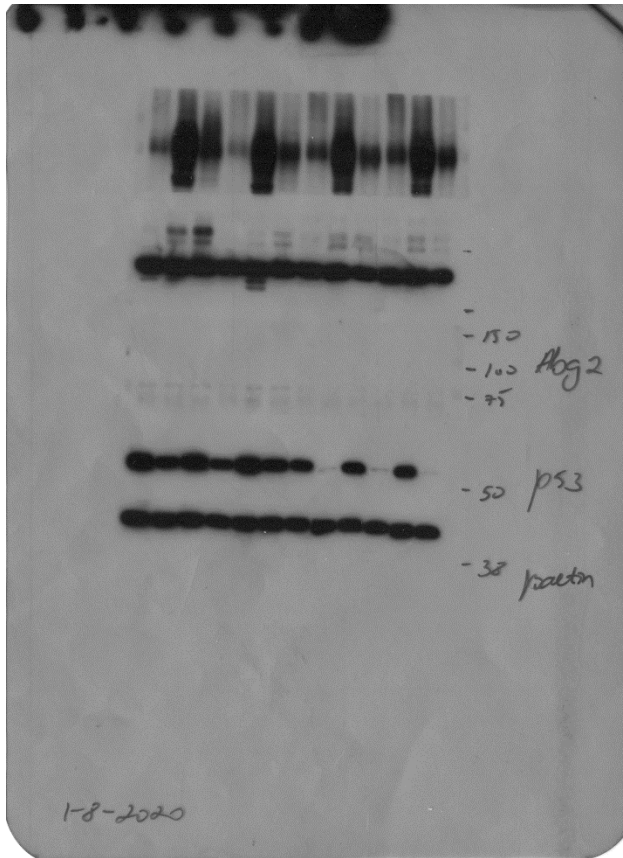

**Supplementary Figure S15.** Rows from the top: (1), (2), and (3) Not used. Please disregard; (4) Only last 6 lanes used. p53 in CCD841 pLKO.1 (lanes 7, 9, and 11) and p53 shRNA (lanes 8, 10, and 12). Used in Figure 6B; (5) Not used. Please disregard.



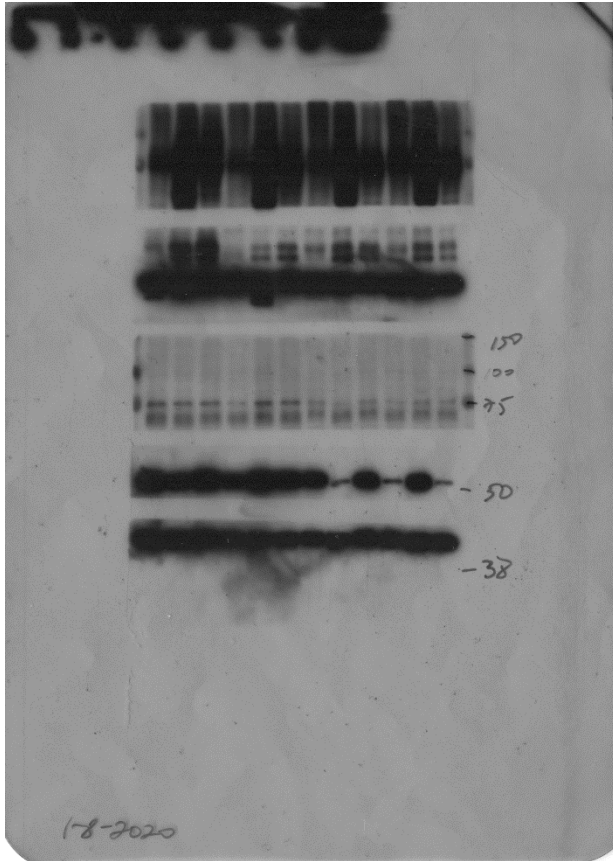

**Supplementary Figure S16.** Higher exposure of Supplementary Figure S15. Rows from the top: (1) and (2) Not used. Please disregard; (3) Only last 6 lanes used. ABCG2 in CCD841 pLKO.1 (lanes 7, 9, and 11) and p53 shRNA (lanes 8, 10, and 12). Used in Figure 6B; (4) and (5) Not used. Please disregard.

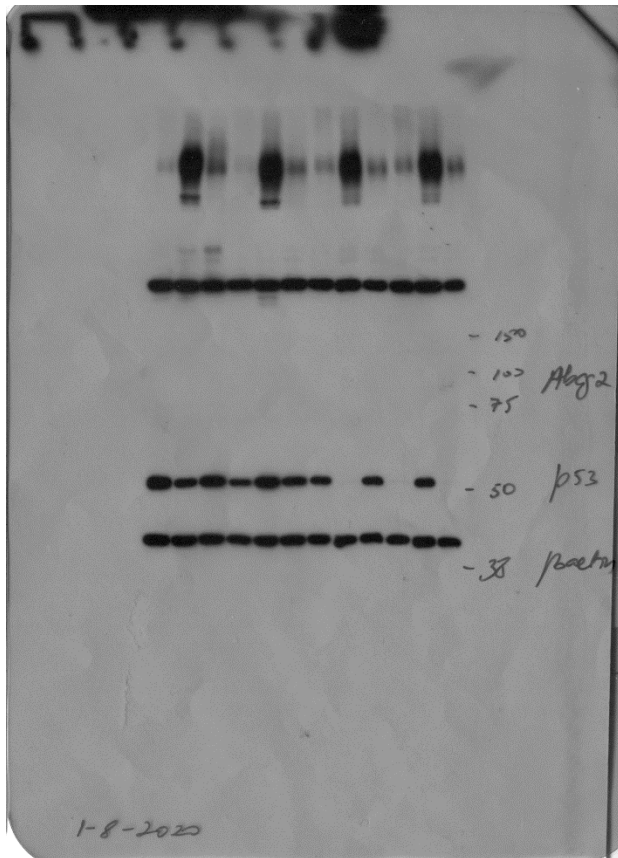

**Supplementary Figure S17.** Lower exposure of Supplementary Figure S15. Only last row used. Please disregard the rest. (5) Only last 6 lanes used.  $\beta$ -actin in CCD841 pLKO.1 (lanes 7, 9, and 11) and p53 shRNA (lanes 8, 10, and 12). Used in Figure 6B.

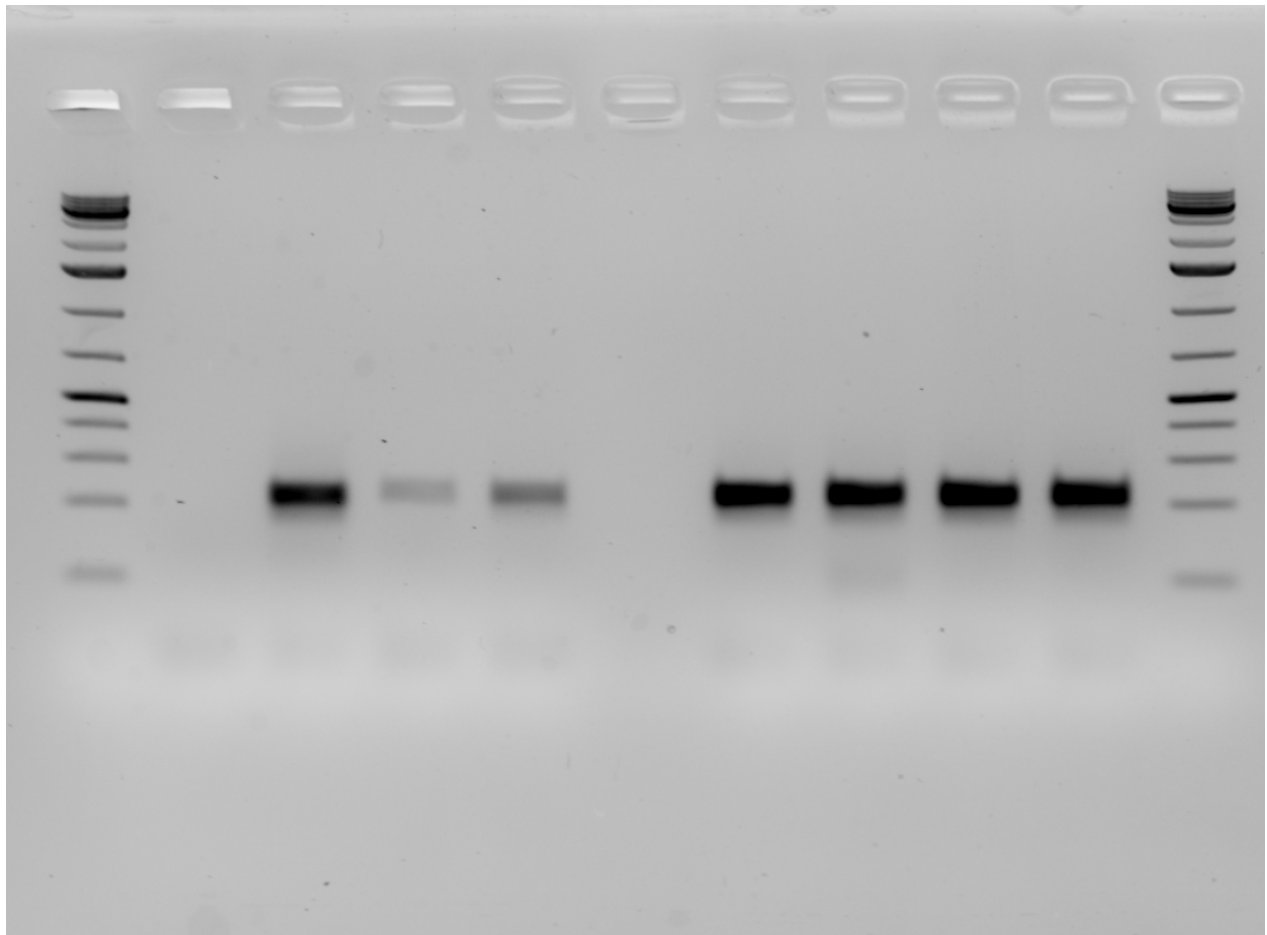

**Supplementary Figure S18.** Agarose gel for ChIP *ABCG2*. First 4 lanes are pull-down. Last 4 lanes are the input. Lanes 1,3,6,8 are the IgG. Lanes 2,4,7,9 are p53 IP. Lanes 1,2,6,7 are CCD841 pLKO.1. Lanes 3,4,8,9 are CCD841 p53 shRNA. Used in Figure 6B.

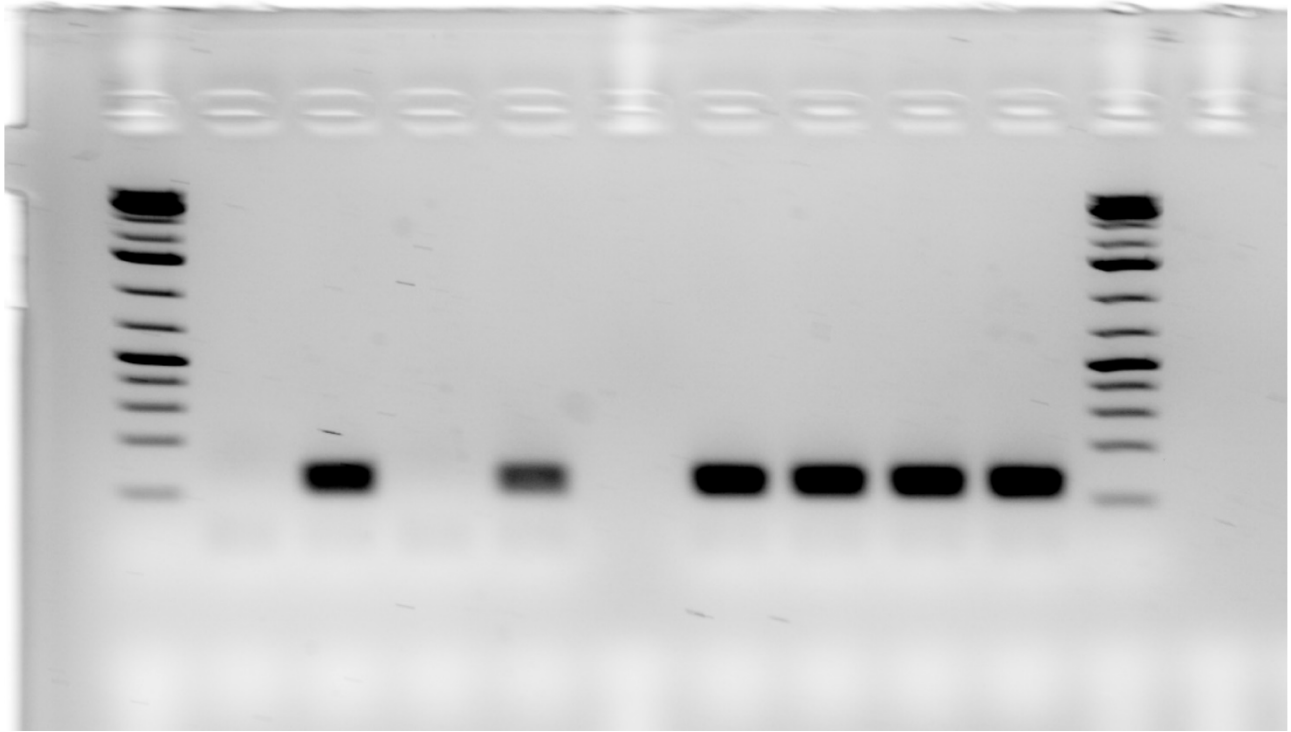

**Supplementary Figure S19.** Agarose gel of ChIP *p21*. First 4 lanes are pull-down. Last 4 lanes are the input. Lanes 1,3,6,8 are the IgG. Lanes 2,4,7,9 are p53 IP. Lanes 1,2,6,7 are CCD841 pLKO.1. Lanes 3,4,8,9 are CCD841 p53 shRNA. Used in Figure 6B.

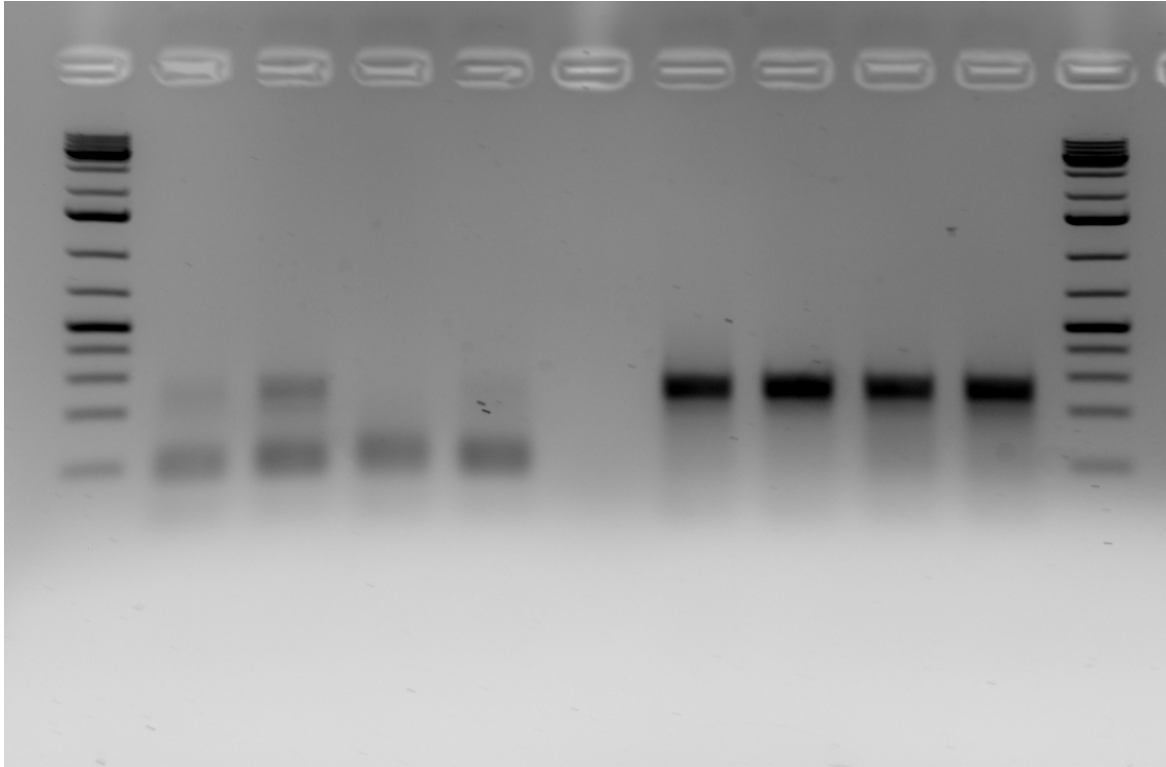

**Supplementary Figure S20.** Agarose gel of ChIP *GADD45A*. First 4 lanes are pull-down. Last 4 lanes are the input. Lanes 1,3,6,8 are the IgG. Lanes 2,4,7,9 are p53 IP. Lanes 1,2,6,7 are CCD841 pLKO.1. Lanes 3,4,8,9 are CCD841 p53 shRNA. Used in Figure 6B.

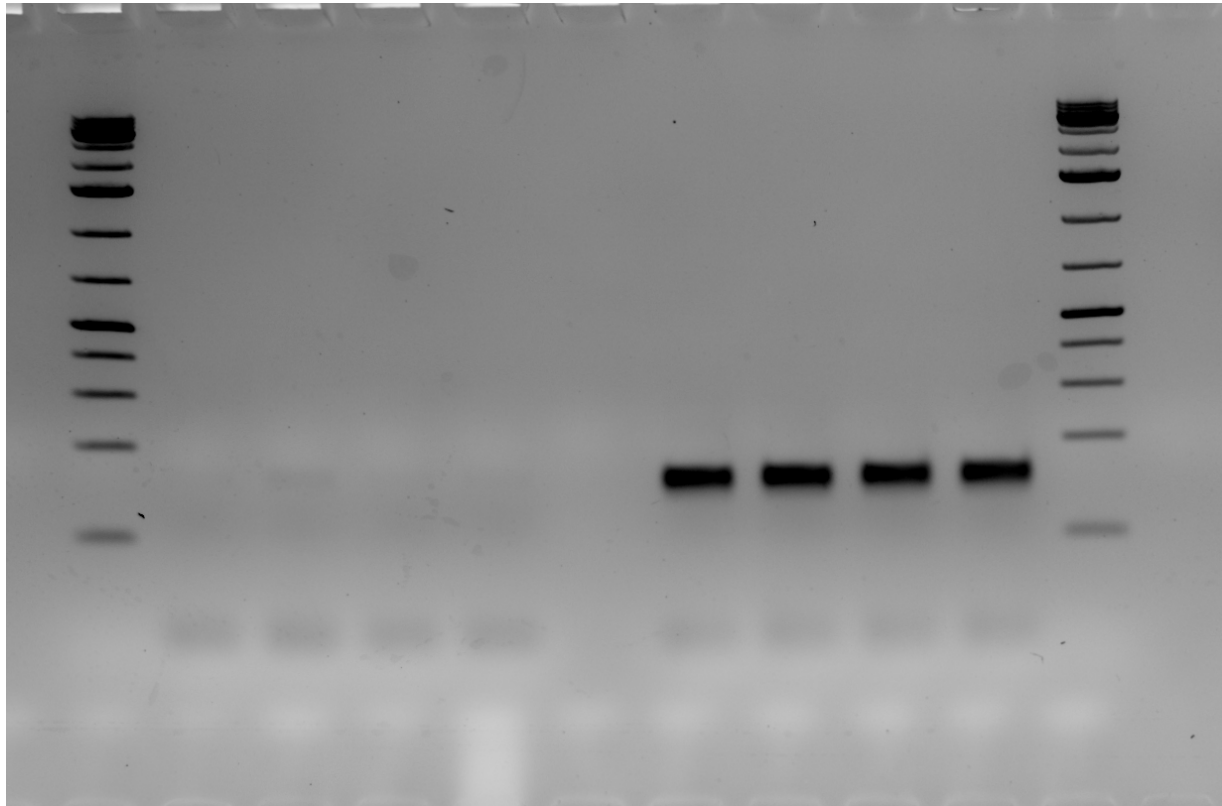

**Supplementary Figure S21.** Agarose gel of ChIP *GAPDH*. First 4 lanes are pull-down. Last 4 lanes are the input. Lanes 1,3,6,8 are the IgG. Lanes 2,4,7,9 are p53 IP. Lanes 1,2,6,7 are CCD841 pLKO.1. Lanes 3,4,8,9 are CCD841 p53 shRNA. Used in Figure 6B.
